# Supplementary material for: Exercise training to increase tumour natural killer‐cell infiltration in men with localised prostate cancer: a randomised controlled trial
Source: PubMed Central journal article supplement — BJU Int. 2022 Jul 18;131(1):116–24. doi: 10.1111/bju.15842 (PMC10084118; doi:10.1111/bju.15842), 2022-07-18
Supplement: BJU-131-116-s001.pdf [file BJU-131-116-s001.pdf]

**Table S8. Patient-Reported Outcome Measures (Per-Protocol Analysis)**

|                                 | Baseline     | Follow-up    | Within-Group change | Between-Group difference |
|---------------------------------|--------------|--------------|---------------------|--------------------------|
| Per-protocol                    | Mean (SD)    | Mean (SD)    | Change (95% CI)     | Difference (95% CI)      |
| <b>Physical well being</b>      |              |              |                     |                          |
| EX                              | 26.2 (2.3)   | 26.8 (1.9)   | 0.6 (-0.2 to 1.5)   | -0.1 (-1.4 to 1.2)       |
| CON                             | 26.2 (2.7)   | 26.8 (1.8)   | 0.7 (-0.3 to 1.7)   |                          |
| <b>Social well being</b>        |              |              |                     |                          |
| EX                              | 23.7 (3.9)   | 22.6 (7.0)   | -1.2 (-5.0 to 2.6)  | -5.5 (-11.2 to 0.2)      |
| CON                             | 21.0 (3.7)   | 25.1 (2.1)   | 4.3 (0.1 to 8.5)    |                          |
| <b>Emotional well being</b>     |              |              |                     |                          |
| EX                              | 20.1 (3.4)   | 20.7 (2.7)   | 0.6 (-1.1 to 2.4)   | -1.5 (-4.1 to 1.2)       |
| CON                             | 17.6 (5.6)   | 19.1 (4.3)   | 2.1 (0.1 to 4.1)    |                          |
| <b>Functional well being</b>    |              |              |                     |                          |
| EX                              | 24.5 (3.1)   | 24.7 (4.6)   | 0.3 (-1.5 to 2.0)   | 0.89 (-1.8 to 3.6)       |
| CON                             | 24.2 (3.7)   | 23.3 (4.4)   | -0.6 (-2.7 to 1.4)  |                          |
| <b>Prostate cancer subscale</b> |              |              |                     |                          |
| EX                              | 38.0 (6.3)   | 43.2 (5.6)   | 5.2 (2.7 to 7.8)    | 0.521 (-3.41 to 4.45)    |
| CON                             | 39.0 (4.4)   | 43.4 (4.7)   | 4.7 (1.7 to 7.7)    |                          |
| <b>Trial Outcome Index</b>      |              |              |                     |                          |
| EX                              | 88.6 (9.6)   | 94.8 (9.4)   | 6.2 (2.5 to 9.9)    | 1.3 (-4.4 to 7.0)        |
| CON                             | 89.4 (8.0)   | 93.4 (8.9)   | 4.9 (0.6 to 9.2)    |                          |
| <b>FACT-G</b>                   |              |              |                     |                          |
| EX                              | 94.5 (9.3)   | 94.8 (11.6)  | 0.4 (-4.0 to 4.7)   | -6.6 (-13.3 to 0.00)     |
| CON                             | 89.0 (9.7)   | 94.3 (9.4)   | 7.0 (2.0 to 12.0)   |                          |
| <b>FACT-P total score</b>       |              |              |                     |                          |
| EX                              | 132.5 (13.8) | 138.1 (14.5) | 5.6 (0.4 to 10.8)   | -6.2 (-14.2 to 1.8)      |
| CON                             | 128.0 (11.2) | 137.6 (11.7) | 11.8 (5.8 to 17.9)  |                          |
| <b>HADS Depression score</b>    |              |              |                     |                          |
| EX                              | 2.0 (2.4)    | 1.7 (2.2)    | -0.3 (-1.1 to 0.5)  | -0.7 (-1.9 to 0.5)       |
| CON                             | 2.0 (2.0)    | 2.6 (3.0)    | 0.4 (-0.5 to 1.3)   |                          |
| <b>HADS Anxiety score</b>       |              |              |                     |                          |
| EX                              | 3.9 (2.8)    | 3.5 (2.8)    | -0.5 (-1.7 to 0.8)  | -0.7 (-2.6 to 1.3)       |
| CON                             | 4.8 (2.7)    | 5.3 (2.7)    | 0.2 (-1.3 to 1.7)   |                          |

Means (SD) are based on all available data for EX and CON at baseline and follow-up (per-protocol analysis EX, n=11 at baseline and follow-up; CON, baseline n=10 and follow-up n=8). The mean differences are estimated means from the mixed models and therefore, within-group change may not reflect the numerical difference between baseline and follow-up.

Abbreviations: Abbreviations: CON, control group; EX, exercise group; FACT-G, Functional Assessment of Cancer Therapy – General; FACT-P, Functional Assessment of Cancer Therapy – Prostate; HADS, Hospital Anxiety and Depression Scale.
