# Supplementary material for: Exercise training to increase tumour natural killer‐cell infiltration in men with localised prostate cancer: a randomised controlled trial
Source: PubMed Central journal article supplement — BJU Int. 2022 Jul 18;131(1):116–24. doi: 10.1111/bju.15842 (PMC10084118; doi:10.1111/bju.15842), 2022-07-18
Supplement: BJU-131-116-s002.pdf [file BJU-131-116-s002.pdf]

**Table S5: Physiological Outcomes (Intention-To-Treat Analysis)**

|                                        | <b>Baseline</b>  | <b>Follow-up</b> | <b>Within-group change</b> | <b>Between-group difference</b> |
|----------------------------------------|------------------|------------------|----------------------------|---------------------------------|
| <b>Intention-to-treat</b>              | <b>Mean (SD)</b> | <b>Mean (SD)</b> | <b>Change (95% CI)</b>     | <b>Difference (95% CI)</b>      |
| <b>Diastolic blood pressure (mmHg)</b> |                  |                  |                            |                                 |
| EX                                     | 89.5 (10.0)      | 85.4 (6.7)       | -3.3 (-6.2 to -0.5)        | -5.0 (-10.0 to -0.1)            |
| CON                                    | 87.5 (12.5)      | 90.7 (12.7)      | 1.7 (-2.3 to 5.7)          |                                 |
| <b>Systolic blood pressure (mmHg)</b>  |                  |                  |                            |                                 |
| EX                                     | 142.8 (19.4)     | 138.0 (16.2)     | -2.3 (7.9 to 3.3)          | -6.8 (-16.5 to 3.0)             |
| CON                                    | 140.2 (19.5)     | 148.5 (19.1)     | 4.4 (3.5 to 12.4)          |                                 |
| <b>Maximum heart rate (beats/min)</b>  |                  |                  |                            |                                 |
| EX                                     | 164.4 (14.1)     | 156.0 (13.7)     | -7.8 (-12.2 to -3.3)       | -10.5 (-2.5 to -2.7)            |
| CON                                    | 154.2 (14.3)     | 154.3 (10.0)     | 2.8 (-3.9 to 9.5)          |                                 |
| <b>Resting heart rate (beats/min)</b>  |                  |                  |                            |                                 |
| EX                                     | 68.1 (12.4)      | 59.6 (9.6)       | -8.9 (-13.7 to -4.0)       | -7.1 (-15.5 to 1.3)             |
| CON                                    | 62.9 (9.1)       | 59.2 (6.8)       | -1.8 (-8.6 to 5.1)         |                                 |
| <b>W<sub>peak</sub> (watt)</b>         |                  |                  |                            |                                 |
| EX                                     | 235.8 (45.2)     | 251.1 (45.9)     | 11.0 (2.2 to 19.8)         | 7.8 (-7.7 to 23.4)              |
| CON                                    | 208.9 (45.1)     | 212.6 (46.2)     | 3.2 (-9.7 to 16.0)         |                                 |
| <b>Android fat mass (kg)</b>           |                  |                  |                            |                                 |
| EX                                     | 2.89 (0.94)      | 2.71 (0.86)      | -0.18 (-0.30 to -0.06)     | -12.5 (-0.23 to 0.20)           |
| CON                                    | 2.78 (1.24)      | 2.61 (1.31)      | -0.17 (-0.35 to 0.01)      |                                 |
| <b>Android fat percentage (%)</b>      |                  |                  |                            |                                 |
| EX                                     | 40.1 (8.9)       | 38.6 (8.6)       | -1.5 (-2.5 to -0.4)        | 1.02 (-1.0 to 3.0)              |
| CON                                    | 38.2 (10.7)      | 35.4 (12.7)      | -2.5 (-4.1 to -0.8)        |                                 |
| <b>BMI (kg/m<sup>2</sup>)</b>          |                  |                  |                            |                                 |
| EX                                     | 26.8 (2.5)       | 26.8 (2.4)       | 0.1 (-0.2 to 0.3)          | 0.3 (-0.2 to 0.8)               |
| CON                                    | 27.2 (3.8)       | 27.3 (3.9)       | -0.3 (-0.7 to 0.1)         |                                 |
| <b>Total fat percentage (%)</b>        |                  |                  |                            |                                 |
| EX                                     | 29.3 (6.1)       | 28.1 (6.0)       | -1.2 (-2.0 to -0.3)        | 0.4 (-1.1 to 2.0)               |
| CON                                    | 28.5 (6.7)       | 27.1 (8.3)       | -1.6 (-3.0 to -0.3)        |                                 |
| <b>Gynoid fat percentage (%)</b>       |                  |                  |                            |                                 |
| EX                                     | 29.7 (5.8)       | 28.5 (5.9)       | -1.2 (-2.5 to 0.1)         | -0.8 (-3.3 to 1.7)              |
| CON                                    | 30.7 (5.2)       | 30.9 (8.1)       | -0.4 (-2.5 to 1.7)         |                                 |

|                                      |                 |                 |                         |                        |
|--------------------------------------|-----------------|-----------------|-------------------------|------------------------|
| <b>Gynoid fat mass (kg)</b>          |                 |                 |                         |                        |
| EX                                   | 3.62 (0.84)     | 3.50 (0.85)     | -0.12 (-0.24 to 0.01)   | 0.13 (-0.10 to 0.37)   |
| CON                                  | 3.64 (0.95)     | 3.54 (1.04)     | -0.25 (-0.45 to -0.05)  |                        |
| <b>Hip circumference (cm)</b>        |                 |                 |                         |                        |
| EX                                   | 101.3 (3.7)     | 102.1 (4.3)     | 0.8 (-0.5 to 2.1)       | 1.5 (-1.0 to 3.9)      |
| CON                                  | 101.6 (5.8)     | 101.6 (6.0)     | -0.7 (-2.7 to 1.4)      |                        |
| <b>Waist circumference (cm)</b>      |                 |                 |                         |                        |
| EX                                   | 100.9 (8.9)     | 100.6 (8.1)     | -0.3 (-1.9 to 1.3)      | 0.6 (-2.4 to 3.5)      |
| CON                                  | 101.5 (12.2)    | 101.6 (13.5)    | -0.8 (-3.3 to 1.7)      |                        |
| <b>Weight (kg)</b>                   |                 |                 |                         |                        |
| EX                                   | 86.1 (8.7)      | 86.2 (8.3)      | 0.10 (-0.7 to 0.9)      | 1.0 (-0.5 to 2.6)      |
| CON                                  | 84.3 (13.0)     | 84.1 (12.9)     | -0.9 (-2.3 to 0.4)      |                        |
| <b>C-peptid (pmol/l)</b>             |                 |                 |                         |                        |
| EX                                   | 856.63 (247.48) | 748.63 (246.71) | -101.6 (-171 to -32.2)  | -70.1 (-195 to 54.7)   |
| CON                                  | 891.40 (363.75) | 804.62 (227.59) | -31.5 (-135 to 72.3)    |                        |
| <b>Fasting glucose mmol/l</b>        |                 |                 |                         |                        |
| EX                                   | 5.5 (0.5)       | 5.6 (0.5)       | 0.09 (-0.1 to 0.3)      | 0.3 (-0.1 to 0.7)      |
| CON                                  | 5.7 (0.5)       | 5.5 (0.4)       | -0.2 (-0.6 to 0.1)      |                        |
| <b>Insulin (pm/l)</b>                |                 |                 |                         |                        |
| EX                                   | 72.32 (29.89)   | 60.58 (28.92)   | -11.82 (-22.7 to -0.97) | -10.8 (-31.2 to 9.62)  |
| CON                                  | 75.10 (61.49)   | 57.86 (36.45)   | -1.03 (-18.3 to 16.25)  |                        |
| <b>HbA1c (mmol/mol)</b>              |                 |                 |                         |                        |
| EX                                   | 35 (2.7)        | 35 (2.7)        | -0.2 (-0.9 to 0.5)      | -0.3 (-1.6 to 1.1)     |
| CON                                  | 36 (2.8)        | 36 (2.3)        | 0.1 (-1.1 to 1.2)       |                        |
| <b>HDL Cholesterol (mmol/l)</b>      |                 |                 |                         |                        |
| EX                                   | 1.5 (0.3)       | 1.4 (0.3)       | -0.1 (-0.10 to 0.01)    | -0.13 (-0.3 to - 0.01) |
| CON                                  | 1.3 (0.2)       | 1.4 (0.2)       | 0.1 (-0.03 to 0.18)     |                        |
| <b>LDL Cholesterol (mmol/l)</b>      |                 |                 |                         |                        |
| EX                                   | 3.5 (0.9)       | 3.3 (0.9)       | -0.2 (-0.5 to 0.1)      | -0.3 (-0.8 to 0.2)     |
| CON                                  | 3.3 (0.8)       | 3.5 (1.2)       | 0.1 (-0.4 to 0.47)      |                        |
| <b>Total cholesterol (mmol/l)</b>    |                 |                 |                         |                        |
| EX                                   | 5.3 (0.9)       | 4.9 (0.9)       | -0.4 (-0.7 to -0.1)     | -0.4 (-0.9 to 0.1)     |
| CON                                  | 4.9 (0.9)       | 5.1 (1.2)       | 0.01 (-0.4 to 0.5)      |                        |
| <b>Triglycerides (mmol/l)</b>        |                 |                 |                         |                        |
| EX                                   | 1.4 (0.8)       | 1.3 (1.0)       | -0.1 (-0.4 to 0.2)      | 0.18 (-0.4 to 0.7)     |
| CON                                  | 1.3 (0.5)       | 1.1 (0.4)       | -0.3 (-0.7 to 0.2)      |                        |
| <b>Leucocytes (10<sup>9</sup>/L)</b> |                 |                 |                         |                        |
| EX                                   | 5.84 (1.76)     | 5.52 (1.61)     | -0.32 (-0.68 to 0.04)   | -0.37 (-1.03 to 0.28)  |

|                                       |                 |                |                        |                       |
|---------------------------------------|-----------------|----------------|------------------------|-----------------------|
| CON                                   | 6.30 (2.73)     | 5.86 (1.90)    | 0.05 (-0.50 to 0.60)   |                       |
| <b>Neutrophils (10<sup>9</sup>/L)</b> |                 |                |                        |                       |
| EX                                    | 3.61 (1.29)     | 3.19 (1.11)    | -0.42 (-0.74 to -0.10) | -0.42 (-1.02 to 0.18) |
| CON                                   | 3.95 (2.39)     | 3.50 (1.37)    | 0.005 (-0.50 to 0.51)  |                       |
| <b>IL-1Ra (pg/ml)</b>                 |                 |                |                        |                       |
| EX                                    | 160.38 (73.48)  | 163.16 (55.03) | 2.77 (-26.9 to 32.4)   | 22.8 (- 32.0 to 77.7) |
| CON                                   | 199.80 (132.26) | 175.71 (77.97) | -20.05 (-66.2 to 26.1) |                       |
| <b>Cortisol (nmol/l)</b>              |                 |                |                        |                       |
| EX                                    | 297.6 (103.6)   | 277.7 (80.5)   | -20.0 (-65.2 to 25.1)  | -33.7 (-115 to 47)    |
| CON                                   | 275.5 (97.2)    | 283.4 (89.6)   | 13.7 (-53.3 to 80.7)   |                       |

Means (SD) are based on all available data for EX and CON at baseline and follow-up (intention-to-treat analysis EX, n=20 at baseline and follow-up; CON, baseline n=10 and follow-up n=8). The mean differences are estimated means from the mixed models, and therefore, within-group change may not reflect the numerical difference between baseline and follow-up.

Abbreviations: BMI, body mass index; CON, control group; EX, exercise group; HDL, high-density lipoproteins; IL, interleukin; LDL, low-density lipoproteins; Ra, receptor antagonist;  $W_{peak}$ , peak power output.
