# Supplementary material for: Exercise training to increase tumour natural killer‐cell infiltration in men with localised prostate cancer: a randomised controlled trial
Source: PubMed Central journal article supplement — BJU Int. 2022 Jul 18;131(1):116–24. doi: 10.1111/bju.15842 (PMC10084118; doi:10.1111/bju.15842), 2022-07-18
Supplement: BJU-131-116-s003.pdf [file BJU-131-116-s003.pdf]

# Training adherence

- Attended sessions
- Sessions not attended
- Follow-up assessment

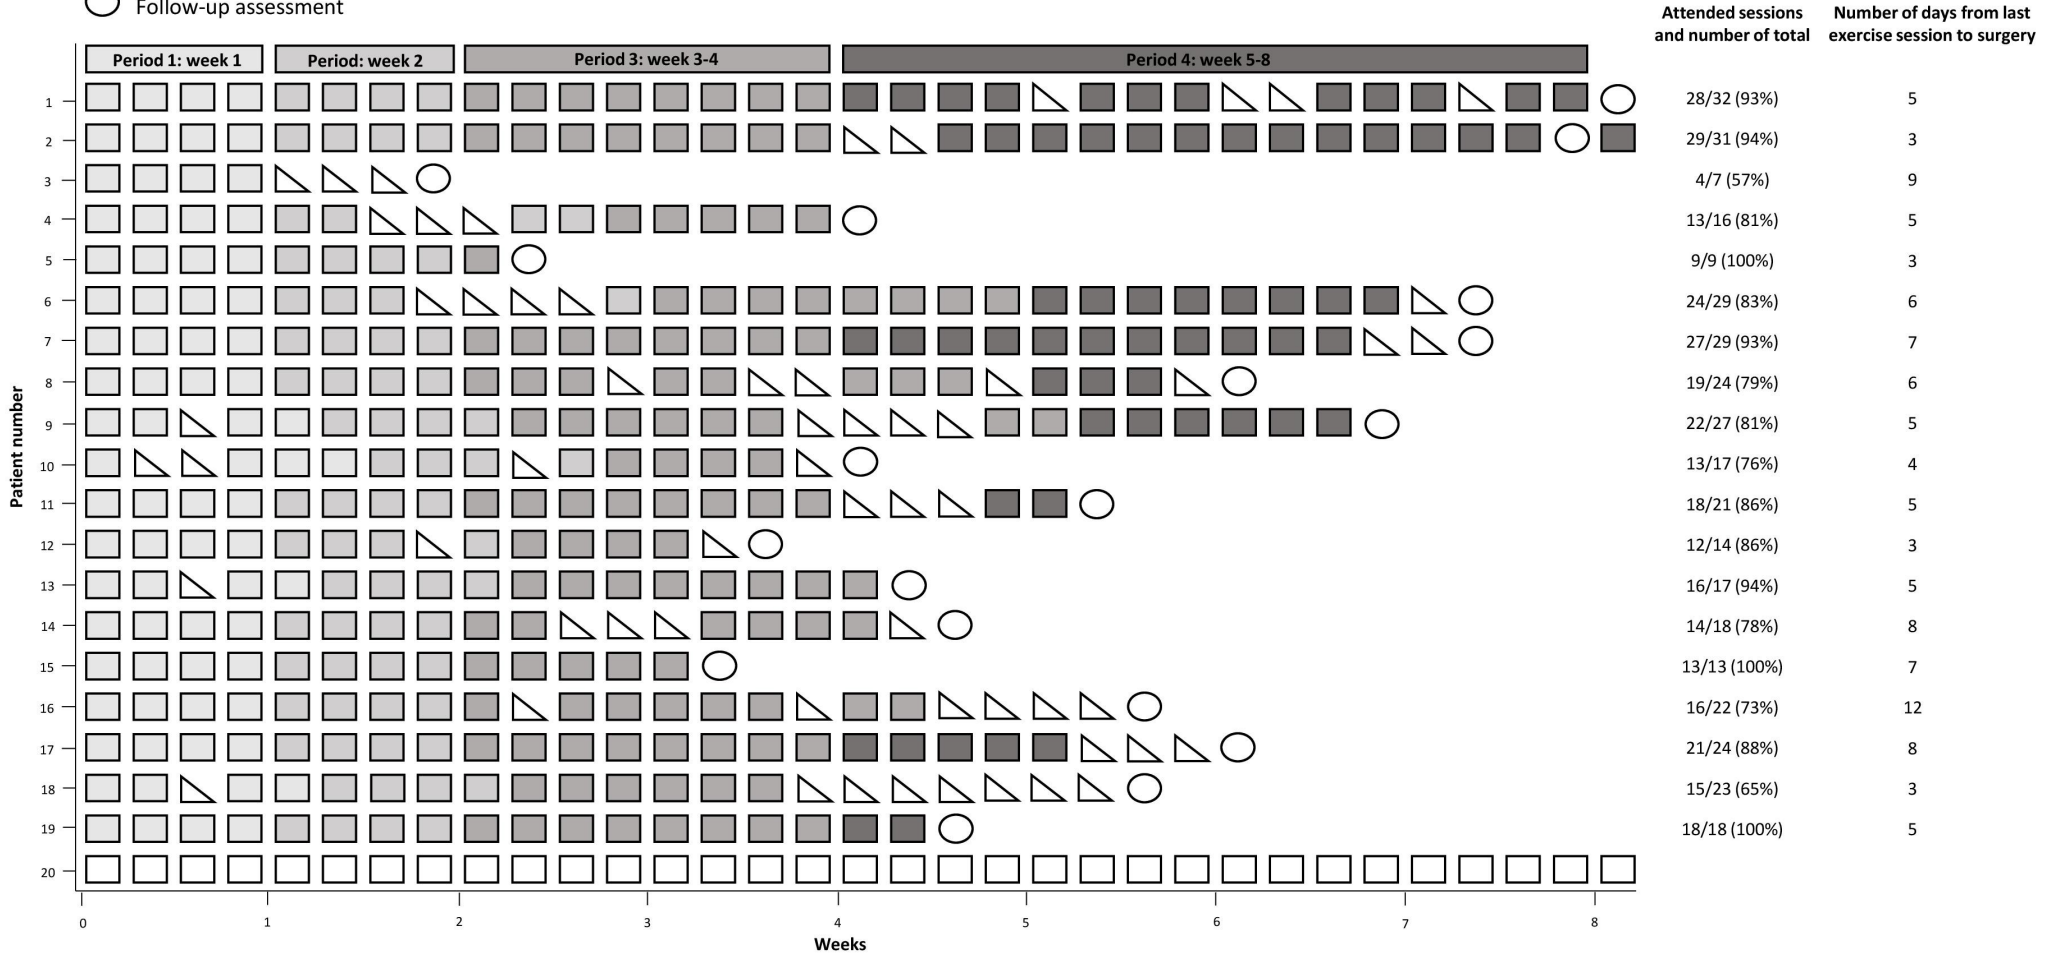

| Period 1:                               | Period 2:                               | Period 3:                               | Period 4:                               |
|-----------------------------------------|-----------------------------------------|-----------------------------------------|-----------------------------------------|
| 4 cycles                                | 4 cycles                                | 5 cycles                                | 6 cycles                                |
| HI: 1 min 100% of $W_{max}$             | HI: 1 min 110% of $W_{max}$             | HI: 1 min 120% of $W_{max}$             | HI: 1 min 120% of $W_{max}$             |
| Active recovery: 3 min 30% of $W_{max}$ |

**Figure S1:** Schematic overview of training adherence, individual exercise attendance, and missed sessions for each participant in the EX group, including exercise intensity and progression throughout the intervention period.
