# Supplementary material for: Exercise training to increase tumour natural killer‐cell infiltration in men with localised prostate cancer: a randomised controlled trial
Source: PubMed Central journal article supplement — BJU Int. 2022 Jul 18;131(1):116–24. doi: 10.1111/bju.15842 (PMC10084118; doi:10.1111/bju.15842), 2022-07-18
Supplement: BJU-131-116-s006.pdf [file BJU-131-116-s006.pdf]

**Table S6. Patient-Reported Outcome Measures (Intention-To-Treat Analysis)**

|                                 | <b>Baseline</b>  | <b>Follow-up</b> | <b>Within-Group change</b> | <b>Between-Group difference</b> |
|---------------------------------|------------------|------------------|----------------------------|---------------------------------|
| <b>Intention-to-treat</b>       | <b>Mean (SD)</b> | <b>Mean (SD)</b> | <b>Change (95% CI)</b>     | <b>Difference (95% CI)</b>      |
| <b>Physical well being</b>      |                  |                  |                            |                                 |
| EX                              | 26.2 (2.1)       | 26.5 (2.1)       | 0.3 (-0.4 to 1.0)          | -0.4 (-1.6 to 0.8)              |
| CON                             | 26.2 (2.7)       | 26.8 (1.8)       | 0.7 (-0.3 to 1.7)          |                                 |
| <b>Social well being</b>        |                  |                  |                            |                                 |
| EX                              | 23.4 (6.3)       | 23.8 (5.5)       | 0.4 (-2.5 to 3.3)          | -4.0 (-9.3 to 1.4)              |
| CON                             | 21.0 (3.7)       | 25.1 (2.1)       | 4.4 (-0.1 to 8.8)          |                                 |
| <b>Emotional well being</b>     |                  |                  |                            |                                 |
| EX                              | 19.0 (4.0)       | 20.3 (3.5)       | 1.3 (0.03 to 2.5)          | -0.9 (-3.1 to 1.4)              |
| CON                             | 17.6 (5.6)       | 19.1 (4.3)       | 2.1 (0.2 to 4.0)           |                                 |
| <b>Functional well being</b>    |                  |                  |                            |                                 |
| EX                              | 24.0 (4.2)       | 24.3 (4.9)       | 0.3 (-0.9 to 1.5)          | 0.9 (-1.4 to 3.2)               |
| CON                             | 24.2 (3.7)       | 23.3 (4.4)       | -0.6 (-2.5 to 1.3)         |                                 |
| <b>Prostate cancer subscale</b> |                  |                  |                            |                                 |
| EX                              | 38.8 (6.3)       | 43.1 (6.1)       | 4.3 (2.5 to 6.2)           | -0.4 (-3.8 to 3.0)              |
| CON                             | 39.0 (4.4)       | 43.4 (4.7)       | 4.7 (1.9 to 7.6)           |                                 |
| <b>Trial Outcome Index</b>      |                  |                  |                            |                                 |
| EX                              | 88.9 (10.4)      | 93.8 (10.1)      | 4.9 (2.3 to 7.6)           | 0.0 (-5.0 to 5.0)               |
| CON                             | 89.4 (8.0)       | 93.4 (8.9)       | 4.9 (0.7 to 9.1)           |                                 |
| <b>FACT-G</b>                   |                  |                  |                            |                                 |
| EX                              | 92.5 (11.6)      | 94.8 (11.4)      | 2.3 (-1.2 to 5.7)          | -4.7 (-11.0 to 1.6)             |
| CON                             | 89.0 (9.7)       | 94.3 (9.4)       | 7.0 (1.7 to 12.3)          |                                 |
| <b>FACT-P total score</b>       |                  |                  |                            |                                 |
| EX                              | 131.3 (15.7)     | 137.8 (14.5)     | 6.6 (2.5 to 10.7)          | -5.2 (-12.8 to 2.4)             |
| CON                             | 128.0 (11.2)     | 137.6 (11.7)     | 11.8 (5.4 to 18.2)         |                                 |
| <b>HADS Depression score</b>    |                  |                  |                            |                                 |
| EX                              | 2.1 (2.7)        | 1.9 (2.6)        | -0.2 (-0.9 to 0.5)         | -0.6 (-1.9 to 0.7)              |
| CON                             | 2.0 (2.0)        | 2.6 (3.0)        | 0.4 (-0.7 to 1.5)          |                                 |
| <b>HADS Anxiety score</b>       |                  |                  |                            |                                 |
| EX                              | 4.4 (2.8)        | 4.3 (4.0)        | -0.2 (-1.5 to 1.2)         | -0.4 (-2.8 to 2.0)              |
| CON                             | 4.8 (2.7)        | 5.3 (2.7)        | 0.3 (-1.8 to 2.3)          |                                 |

Means (SD) are based on all available data for EX and CON at baseline and follow-up (intention-to-treat analysis EX, n=20 at baseline and follow-up; CON, baseline n=10 and follow-up n=8). The mean differences are estimated means from the mixed models and therefore, within-group change may not reflect the numerical difference between baseline and follow-up.

Abbreviations: Abbreviations: CON, control group; EX, exercise group; FACT-G, Functional Assessment of Cancer Therapy – General; FACT-P, Functional Assessment of Cancer Therapy – Prostate; HADS, Hospital Anxiety and Depression Scale.
