# Supplementary material for: Exercise training to increase tumour natural killer‐cell infiltration in men with localised prostate cancer: a randomised controlled trial
Source: PubMed Central journal article supplement — BJU Int. 2022 Jul 18;131(1):116–24. doi: 10.1111/bju.15842 (PMC10084118; doi:10.1111/bju.15842), 2022-07-18
Supplement: BJU-131-116-s007.pdf [file BJU-131-116-s007.pdf]

**Table S7. Physiological Outcomes (Per-Protocol Analysis)**

|                                                    | <b>Baseline</b>  | <b>Follow-up</b> | <b>Within-group change</b> | <b>Between-group difference</b> |
|----------------------------------------------------|------------------|------------------|----------------------------|---------------------------------|
| <b>Per-protocol</b>                                | <b>Mean (SD)</b> | <b>Mean (SD)</b> | <b>Change (95% CI)</b>     | <b>Difference (95% CI)</b>      |
| <b>VO<sub>2peak</sub> (L/min)<sup>a</sup></b>      |                  |                  |                            |                                 |
| EX                                                 | 2.81 (0.55)      | 3.01 (0.58)      | 0.13 (-0.04 to 0.30)       | 0.05 (-0.21 to 0.30)            |
| CON                                                | 2.62 (0.59)      | 2.70 (0.64)      | 0.08 (-0.10 to 0.27)       |                                 |
| <b>VO<sub>2peak</sub> (ml/min/kg)<sup>a</sup></b>  |                  |                  |                            |                                 |
| EX                                                 | 33.7 (7.8)       | 36.0 (7.9)       | 1.7 (-0.6 to 4.0)          | 0.5 (-2.9 to 3.8)               |
| CON                                                | 31.4 (8.4)       | 32.6 (8.6)       | 1.2 (-1.2 to 3.6)          |                                 |
| <b>W<sub>peak</sub>(watt)</b>                      |                  |                  |                            |                                 |
| EX                                                 | 230.1 (51.2)     | 253.4 (57.2)     | 15.8 (4.3 to 27.2)         | 12.6 (-4.1 to 29.3)             |
| CON                                                | 208.9 (45.1)     | 212.6 (46.2)     | 3.2 (-9.0 to 15.3)         |                                 |
| <b>Diastolic blood pressure (mmHg)<sup>c</sup></b> |                  |                  |                            |                                 |
| EX                                                 | 89.6 (9.8)       | 85.2 (7.1)       | -3.5 (-7.3 to 0.2)         | -5.2 (-10.6 to 0.3)             |
| CON                                                | 87.5 (12.5)      | 90.7 (12.7)      | 1.7 (-2.3 to 5.6)          |                                 |
| <b>Systolic blood pressure (mmHg)<sup>c</sup></b>  |                  |                  |                            |                                 |
| EX                                                 | 143.9 (20.2)     | 141.7 (19.2)     | 0.6 (-6.3 to 7.6)          | -3.6 (-13.7 to 6.6)             |
| CON                                                | 140.2 (19.5)     | 148.5 (19.1)     | 4.2 (-3.2 to 11.5)         |                                 |
| <b>Maximum heart rate (beats/min)</b>              |                  |                  |                            |                                 |
| EX                                                 | 163.2 (13.8)     | 155.0 (16.7)     | -8.3 (-14.8 to -1.7)       | -11.0 (-20.8 to -1.3)           |
| CON                                                | 154.2 (14.3)     | 154.3 (10.0)     | 2.8 (-3.9 to 9.5)          |                                 |
| <b>Resting heart rate (beats/min)<sup>c</sup></b>  |                  |                  |                            |                                 |
| EX                                                 | 63.7 (7.3)       | 59.0 (7.6)       | -4.3 (-9.1 to 0.5)         | -2.8 (-9.8 to 4.2)              |
| CON                                                | 62.9 (9.1)       | 59.2 (6.8)       | -1.5 (-6.6 to 3.6)         |                                 |
| <b>Android fat mass (kg)</b>                       |                  |                  |                            |                                 |
| EX                                                 | 2.85 (0.93)      | 2.63 (0.87)      | -0.22 (-0.39 to -0.06)     | -0.06 (0.31 to 0.20)            |
| CON                                                | 2.78 (1.24)      | 2.61 (1.31)      | -0.17 (-0.36 to 0.03)      |                                 |
| <b>Android fat percentage (%)</b>                  |                  |                  |                            |                                 |
| EX                                                 | 39.9 (10.6)      | 38.0 (10.0)      | -2.0 (-3.6 to -0.3)        | 0.5 (-2.0 to 3.0)               |
| CON                                                | 38.2 (10.7)      | 35.4 (12.7)      | -2.5 (-4.4 to -0.6)        |                                 |
| <b>BMI (kg/m<sup>2</sup>)</b>                      |                  |                  |                            |                                 |
| EX                                                 | 26.6 (2.3)       | 26.7 (2.2)       | 0.1 (-0.3 to 0.5)          | 0.4 (-0.2 to 1.0)               |
| CON                                                | 27.2 (3.8)       | 27.3 (3.9)       | -0.3 (-0.7 to 0.2)         |                                 |

|                                      |                 |                 |                        |                       |
|--------------------------------------|-----------------|-----------------|------------------------|-----------------------|
| <b>Total fat percentage (%)</b>      |                 |                 |                        |                       |
| EX                                   | 29.4 (7.5)      | 27.7 (7.2)      | -1.7 (-3.0 to -0.4)    | -0.1 (-2.2 to 2.0)    |
| CON                                  | 28.5 (6.7)      | 27.1 (8.3)      | -1.6 (-3.2 to -0.1)    |                       |
| <b>Total fat mass (kg)</b>           |                 |                 |                        |                       |
| EX                                   | 24.2 (6.9)      | 22.8 (6.6)      | -1.4 (-2.7 to -0.1)    | 0.1 (-1.9 to 2.1)     |
| CON                                  | 23.6 (8.0)      | 22.5 (8.8)      | -1.5 (-3.0 to 0.1)     |                       |
| <b>Gynoid fat percentage (%)</b>     |                 |                 |                        |                       |
| EX                                   | 29.9 (6.6)      | 28.3 (6.7)      | -1.6 (-3.8 to 0.6)     | -1.2 (-4.6 to 2.1)    |
| CON                                  | 30.7 (5.2)      | 30.9 (8.1)      | -0.4 (-2.9 to 2.2)     |                       |
| <b>Gynoid fat mass (kg)</b>          |                 |                 |                        |                       |
| EX                                   | 3.65 (0.97)     | 3.49 (0.96)     | -0.15 (-0.36 to 0.05)  | 0.096 (-0.22 to 0.41) |
| CON                                  | 3.64 (0.95)     | 3.54 (1.0)      | -0.25 (-0.49 to -9.78) |                       |
| <b>Lean mass (kg)</b>                |                 |                 |                        |                       |
| EX                                   | 57.40 (6.80)    | 58.90 (6.93)    | 1.50 (0.74 to 2.25)    | 0.69 (-0.48 to 1.85)  |
| CON                                  | 57.27 (6.38)    | 58.46 (7.32)    | 0.81 (-0.08 to 1.70)   |                       |
| <b>Hip circumference (cm)</b>        |                 |                 |                        |                       |
| EX                                   | 101.4 (2.8)     | 102.2 (3.7)     | 0.8 (-1.0 to 2.5)      | 1.5 (-1.2 to 4.1)     |
| CON                                  | 101.6 (5.8)     | 101.6 (6.0)     | -0.7 (-2.7 to 1.3)     |                       |
| <b>Waist circumference (cm)</b>      |                 |                 |                        |                       |
| EX                                   | 100.8 (7.7)     | 100.5 (8.0)     | -0.3 (-2.7 to 2.2)     | 0.6 (-3.2 to 4.3)     |
| CON                                  | 101.5 (12.2)    | 101.6 (13.5)    | -0.8 (-3.7 to 2.0)     |                       |
| <b>Weight (kg)</b>                   |                 |                 |                        |                       |
| EX                                   | 85.1 (8.6)      | 85.1 (8.6)      | 0.1 (-1.2 to 1.4)      | 1.0 (-0.9 to 3.0)     |
| CON                                  | 84.3 (13.0)     | 84.1 (12.9)     | -0.9 (-2.4 to 0.6)     |                       |
| <b>C-peptid (pmol/l)<sup>d</sup></b> |                 |                 |                        |                       |
| EX                                   | 891.20 (252.82) | 749.45 (262.84) | -123.5 (-235 to -12.1) | -90.6 (-257 to 76.2)  |
| CON                                  | 891.40 (363.75) | 804.62 (227.59) | -32.9 (-157 to 91.3)   |                       |
| <b>Fasting glucose mmol/l</b>        |                 |                 |                        |                       |
| EX                                   | 5.7 (0.5)       | 5.7 (0.4)       | 0.0 (-0.3 to 0.3)      | 0.2 (-0.3 to 0.7)     |
| CON                                  | 5.7 (0.5)       | 5.5 (0.4)       | -0.2 (-0.6 to 0.15)    |                       |
| <b>Insulin (pm/l)<sup>d</sup></b>    |                 |                 |                        |                       |
| EX                                   | 76.80 (26.59)   | 57.91 (28.87)   | -17.0 (-32.9 to -1.13) | -16.2 (-40.8 to 8.4)  |
| CON                                  | 75.10 (61.49)   | 57.86 (36.45)   | -0.8 (-19.6 to 18.04)  |                       |
| <b>HbA1c (mmol/mol)</b>              |                 |                 |                        |                       |
| EX                                   | 34 (3.0)        | 34 (2.7)        | 0.0 (-1.1 to 1.1)      | -0.1 (-1.8 to 1.6)    |
| CON                                  | 36 (2.8)        | 37 (2.3)        | 0.1 (-1.2 to 1.4)      |                       |
| <b>HDL Cholesterol (mmol/l)</b>      |                 |                 |                        |                       |
| EX                                   | 1.6 (0.3)       | 1.5 (0.3)       | -0.1 (-0.2 to -0.01)   | -0.2 (-0.3 to -0.04)  |

|                                       |                 |                |                       |                        |
|---------------------------------------|-----------------|----------------|-----------------------|------------------------|
| CON                                   | 1.3 (0.23)      | 1.4 (0.2)      | 0.1 (-0.02 to 0.2)    |                        |
| <b>LDL Cholesterol (mmol/l)</b>       |                 |                |                       |                        |
| EX                                    | 3.6 (0.7)       | 3.4 (0.6)      | -0.2 (-0.6 to 0.2)    | -0.3 (-0.9 to 0.3)     |
| CON                                   | 3.3 (0.8)       | 3.5 (1.2)      | 0.1(-0.4 to 0.5)      |                        |
| <b>Total cholesterol (mmol/l)</b>     |                 |                |                       |                        |
| EX                                    | 5.4 (0.8)       | 4.9 (0.6)      | -0.5 (-0.9 to -0.1)   | -0.5 (-1.2 to 0.1)     |
| CON                                   | 4.9 (0.9)       | 5.1 (1.2)      | 0.03 (-0.5 to 0.5)    |                        |
| <b>Triglycerides (mmol/l)</b>         |                 |                |                       |                        |
| EX                                    | 1.4 (0.8)       | 1.1 (0.5)      | -0.3 (-0.6 to 0.03)   | -0.01 (-0.5 to 0.5)    |
| CON                                   | 1.3 (0.5)       | 1.1 (0.4)      | -0.3 (-0.6 to 0.1)    |                        |
| <b>Leucocytes (10<sup>9</sup>/L)</b>  |                 |                |                       |                        |
| EX                                    | 5.44 (1.73)     | 5.16 (1.45)    | -0.27 (-0.73 to 0.18) | -0.33 (-1.03 to 0.37)  |
| CON                                   | 6.30 (2.73)     | 5.86 (1.90)    | 0.06 (-0.47 to 0.59)  |                        |
| <b>Neutrophils (10<sup>9</sup>/L)</b> |                 |                |                       |                        |
| EX                                    | 3.25 (1.20)     | 2.99 (1.15)    | -0.26 (-0.65 to 0.14) | -0.28 (-0.88 to 0.33)  |
| CON                                   | 3.95 (2.39)     | 3.50 (1.37)    | 0.02 (-0.44 to 0.48)  |                        |
| <b>IL-1Ra (pg/ml)</b>                 |                 |                |                       |                        |
| EX                                    | 149.52 (58.70)  | 162.56 (66.04) | 13.0 (-26.9 to 52.9)  | 32.8 (-28.3 to 93.8)   |
| CON                                   | 199.80 (132.26) | 175.71 (77.97) | -19.7 (-65.9 to 26.5) |                        |
| <b>Cortisol (nmol/l)<sup>d</sup></b>  |                 |                |                       |                        |
| EX                                    | 331.5 (106.1)   | 293.8 (87.0)   | -33.1 (-80.9 to 14.8) | -49.6 (-121.0 to 22.0) |
| CON                                   | 275.5 (97.2)    | 283.4 (89.6)   | 16.5 (-36.7 to 69.6)  |                        |
| <b>Lymphocytes (10<sup>9</sup>/L)</b> |                 |                |                       |                        |
| EX                                    | 1.51 (0.50)     | 1.50 (0.36)    | -0.01 (-0.15 to 0.13) | -0.09 (-0.30 to 0.13)  |
| CON                                   | 1.58 (0.44)     | 1.69 (0.57)    | 0.08 (-0.08 to 0.24)  |                        |
| <b>Hs-CRP (mg/L)<sup>b</sup></b>      |                 |                |                       |                        |
| EX                                    | 3.42 (6.05)     | 5.03 (10.53)   | 0.84 (0.43 to 1.65)   | 0.75 (0.35 to 1.64)    |
| CON                                   | 5.13 (11.17)    | 1.68 (2.06)    | 1.07 (0.49 to 2.35)   |                        |
| <b>IL-6 (pg/ml)</b>                   |                 |                |                       |                        |
| EX                                    | 0.65 (0.42)     | 0.66 (0.64)    | 0.01 (-0.17 to 0.20)  | -0.02 (-0.30 to 0.27)  |
| CON                                   | 4.09 (11.10)    | 0.60 (0.21)    | 0.03 (-0.19 to 0.25)  |                        |
| <b>TNF-alpha (pg/ml)</b>              |                 |                |                       |                        |
| EX                                    | 2.52 (0.60)     | 2.50 (0.46)    | -0.02 (-0.21 to 0.17) | -0.06 (-0.36 to 0.23)  |
| CON                                   | 2.56 (0.74)     | 2.45 (0.63)    | 0.05 (-0.18 to 0.27)  |                        |
| <b>PSA (µg/L)<sup>b</sup></b>         |                 |                |                       |                        |
| EX                                    | 11.28 (8.93)    | 9.92 (6.80)    | 0.897 (0.78 to 1.04)  | 0.889 (0.8 to 1.1)     |
| CON                                   | 15.71 (13.91)   | 16.31 (13.69)  | 0.992 (0.84 to 1.18)  |                        |

Means (SD) are based on all available data for EX and CON at baseline and follow-up (per-protocol analysis EX, n=11 at baseline and follow-up; CON, baseline n=10 and follow-up n=8). The mean differences are estimated means from the mixed models, and therefore, within-group change may not reflect the numerical difference between baseline and follow-up.

<sup>a</sup>VO<sub>2</sub>peak and W<sub>peak</sub> are based on cardiorespiratory tests meeting two of the following test criteria: peak RER ≥ 1.10, PRE ≥ 18, and a VO<sub>2</sub> plateau (EX, baseline n=10, follow-up n= 19; CON, baseline and follow-up n=8).

<sup>b</sup>PSA and hs-CRP are analyzed on log-transformed data and estimates for within-group changes and between-group differences are back-transformed and reported as median relative changes/differences with back-transformed 95% CIs.

<sup>c</sup>Systolic and diastolic blood pressure, and resting heart rate analysis is based on EX n=9, due to missing data.

<sup>d</sup>C-peptide, insulin and cortisol analysis is based on EX n=10, due to missing data.

Abbreviations: BMI, body mass index; CON, control group; EX, exercise group; HDL, high-density lipoproteins; Hs-CRP, high-sensitivity C-reactive protein; IL, interleukin; LDL, low-density lipoproteins; PSA, prostate-specific antigen; Ra, receptor antagonist; RER, respiratory exchange ratio; RPE, rate of perceived exertion; TNF, tumor necrosis factor; W<sub>peak</sub>, peak power output.
