# Supplementary material for: Exercise training to increase tumour natural killer‐cell infiltration in men with localised prostate cancer: a randomised controlled trial
Source: PubMed Central journal article supplement — BJU Int. 2022 Jul 18;131(1):116–24. doi: 10.1111/bju.15842 (PMC10084118; doi:10.1111/bju.15842), 2022-07-18
Supplement: BJU-131-116-s009.pdf [file BJU-131-116-s009.pdf]

### Table S3. Cardiorespiratory Fitness Assessment

Cardiorespiratory fitness was assessed as peak oxygen uptake ( $VO_{2peak}$ ) during a maximal incremental test performed on a stationary bike (LC4, Monark Exercise AB, Vansbro, Sweden). Patients performed a 3 min warm-up at 70-watt load followed by an increase of 20 watts every minute until exhaustion. Gas exchange parameters and heart rate were measured throughout the test using online measurement equipment (Quark; COSMED, Rome, Italy). Breath-by-breath data with respiratory exchange rate (RER) values  $< 0.60$  or  $> 1.60$  were considered artifactual (e.g., due to talking, premature end of breath) and were manually removed. The data were then smoothed using 10-seconds averaging, and  $VO_{2peak}$  and peak RER were defined as the highest 30-second average of  $VO_2$  and RER, respectively. Rating of perceived exertion (RPE) was obtained immediately after volitional exhaustion using the Borg (6-20) scale <sup>1</sup>.  $VO_{2peak}$  values were included in the analysis if two of the following criteria were met: peak RER  $\geq 1.10$ , RPE  $\geq 18$ , and a  $VO_2$  plateau. A  $VO_2$  plateau was evaluated as follows: linear regression was used to model the  $VO_2$  slope (L/min) of the submaximal part of the test, i.e., excluding the warm-up (to account for the slow  $VO_2$  component) and the last two minutes (to account for a possible  $VO_2$  plateau). The linear model was extrapolated to the end of the test. A plateau was considered evident if the mean difference between the modeled  $VO_2$  and the measured  $VO_2$  (i.e., the residuals) of the last minute of the test was greater than half of the modeled  $VO_2$  slope <sup>2</sup>.

1. Borg GA. Psychophysical bases of perceived exertion. *Medicine & Science in Sports & Exercise* 1982.

2. Thomsen SN, Sundberg A, Osterkamp J, Thorsen-Streit S, Østerlind K, Krarup P-M, Vistisen K, Pedersen BK, Christensen JF. Interindividual changes in peak oxygen consumption in patients with colorectal cancer following endurance training: a secondary analysis of the I-WALK-CRC study. *Acta Oncologica* 2020: 1-5.
